# Supplementary material for: AP-2αInhibits c-MYC Induced Oxidative Stress and Apoptosis in HaCaT Human Keratinocytes
Source: Hindawi journal article supplement (doi:10.1155/2009/780874), 2009-01-01
Supplement: f1 [file 780874.f1.pdf]

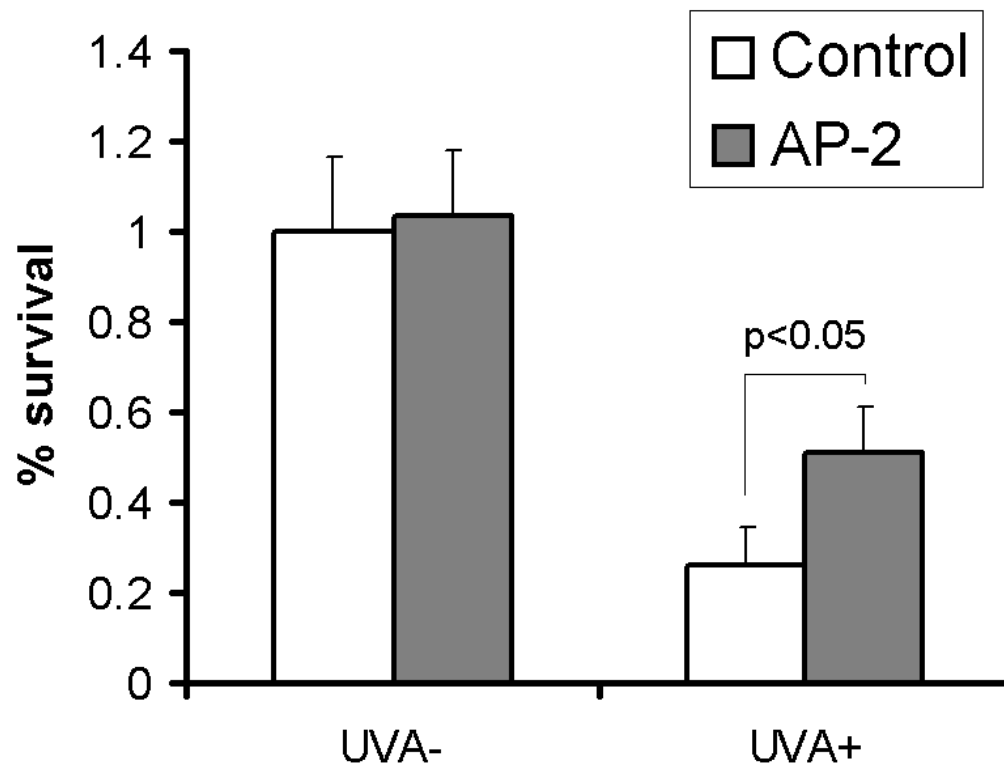

**Supplemental Figure 1.** Overexpression of AP-2 $\alpha$  increased HaCaT cell survival rate upon UVA irradiation. HaCaT cells were infected with 100 MOI Ad-Bgl II or Ad-AP-2 $\alpha$  for 24 hours. The cells then received 5 J per cm<sup>2</sup> UVA irradiation. 100 cells were seeded immediately after UVA irradiation per plate. Clones that contained more than 50 cells were counted 2 weeks later. The survival rate of Bgl II control group was set arbitrarily to 100%. Error bars stands for SD, n=3.

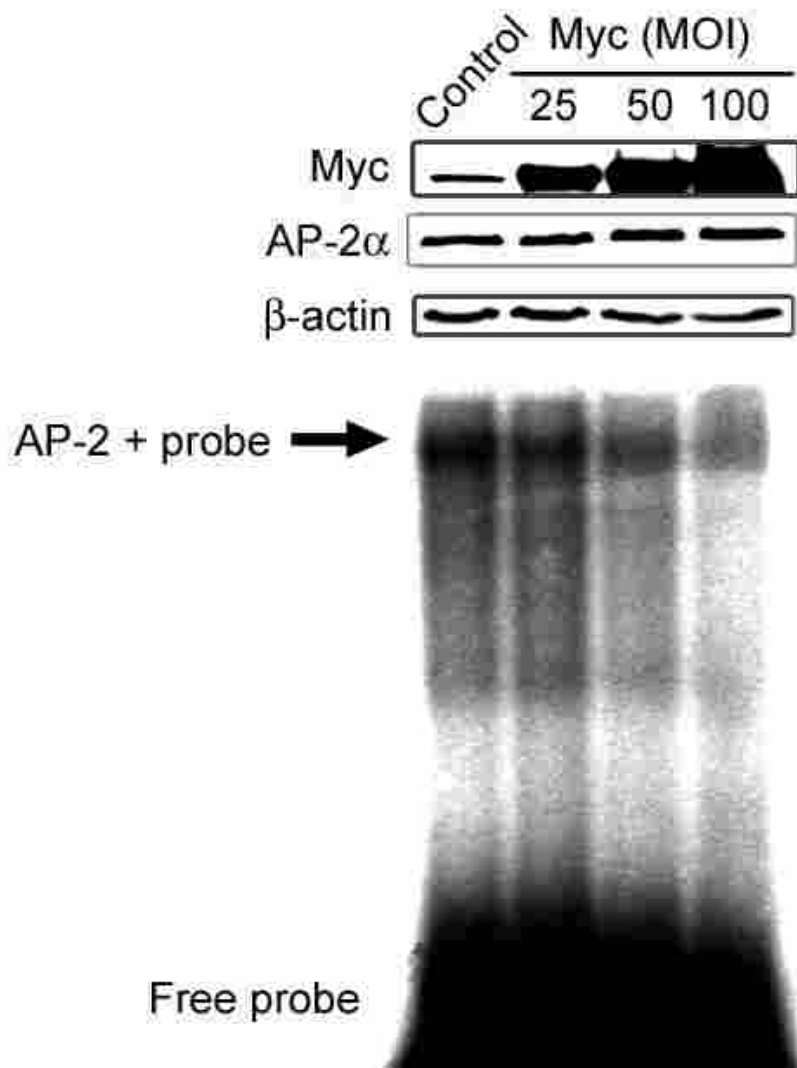

**Supplemental Figure 2.** Overexpression c-MYC protein caused decreasing of AP-2α DNA binding activity. HaCaT cells were infected with increasing MOI of Ad-c-MYC. 24 hours later, the nuclear protein was extracted and 40 μg was analyzed with western blot and 5 μg was analyzed with gel shift assay. AP-2α DNA binding activity decreased while c-MYC protein levels increased. AP-2α protein level also showed no significant increased after c-MYC infection.
